# Supplementary material
Source: Research Square preprint supplement (doi:10.21203/rs.3.rs-8609994/v1)
Supplement: Supplementary file 1 [file 5b3f188a28065162d928a631.docx]

**Table S1: shRNA and main primer sequences**

| Oligo name |  |  |
| --- | --- | --- |
| Bax F：  GATGCGTCCACCAAGAAGCTGAG | Sangon Biotech | N/A |
| Bax R：  CACGGCGGCAATCATCCTCTG | Sangon Biotech | N/A |
| Bim F：  TAAGTTCTGAGTGTGACCGAGA | Sangon Biotech | N/A |
| Bim R：  GCTCTGTCTGTAGGGAGGTAGG | Sangon Biotech | N/A |
| Caspase 3 F：ACATGGAAGCGAATCAATGGACTC | Sangon Biotech | N/A |
| Caspase 3 R：AAGGACTCAAATTCTGTTGCCACC | Sangon Biotech | N/A |
| Cyt c F：  CGTTGTGCCAGCGACTAAAAA | Sangon Biotech | N/A |
| Cyt c R：GATTTGGCCCAGTCTTGTGC | Sangon Biotech | N/A |
| GAPDH R:  GGTTGTCTCCTGCGACTTCA | Sangon Biotech | N/A |
| GAPDH F:  GGTCCAGGGTTTCTTACTCC | Sangon Biotech | N/A |

**Table S2: List of primary antibodies and their sources**

| **Antibodies** | **Source (item number)** | **WB** |
| --- | --- | --- |
| E-Cadherin | CST 3195 | 1:1000 |
| N-Cadherin | CST 13116 | 1:1000 |
| γ-H2Ax | CST 7631 | 1:1000 |
| Bcl-xL | CST 2764 | 1:1000 |
| Bax | CST 41162 | 1:1000 |
| Bim | CST 2933 | 1:1000 |
| Cleaved-caspase3 | CST 9664 | 1:1000 |
| Survivin | CST 2808 | 1:1000 |
| Cytochrome C | CST 11940 | 1:1000 |
| VDAC1 | CST 4661 | 1:5000 |
| Parkin | CST 32833 | 1:1000 |
| p-Parkin | CST 36728 | 1:1000 |
| PINK1 | CST 6946 | 1:1000 |
| p-PINK1 | CST 89010 | 1:1000 |
| BNIP3 | CST 44060 | 1:1000 |
| ERK1/2 | CST 4695 | 1:1000 |
| p-ERK1/2 | CST 4370 | 1:1000 |
| p38 | CST 2387 | 1:1000 |
| p-p38 | CST 4511 | 1:1000 |
| AKT | CST 9272 | 1:1000 |
| p-AKT | CST 4060 | 1:1000 |
| GAPDH | CST 5174 | 1:5000 |
